# Supplementary material
Source: Springer Nature journal article supplement (https://www.springermedizin.de/resource/supplementary/12933_2005_38_MOESM9_ESM.pdf/9539486)

# Sodium Thiosulfate

2 Na<sup>+</sup>

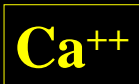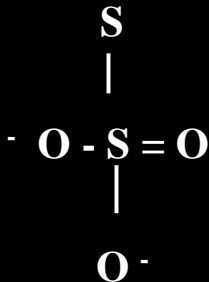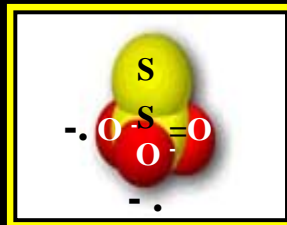

( 5 H<sub>2</sub>O<sub>2</sub> ) peroxide

( O<sub>2</sub> · ) superoxide

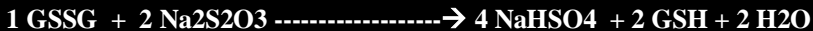

*Oxidized glutathione*

*Glutathione reductase*

*glutathione*

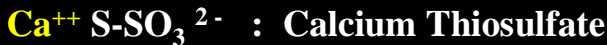

Supplement: MOESM9 [file 9539486]
